# Supplementary material for: Development of whole-genome multiplex assays and construction of an integrated genetic map using SSR markers in Senegalese sole
Source: PubMed Central journal article supplement (PMC7736592; doi:10.1038/s41598-020-78397-w), 2020-12-14

# Multiplex A

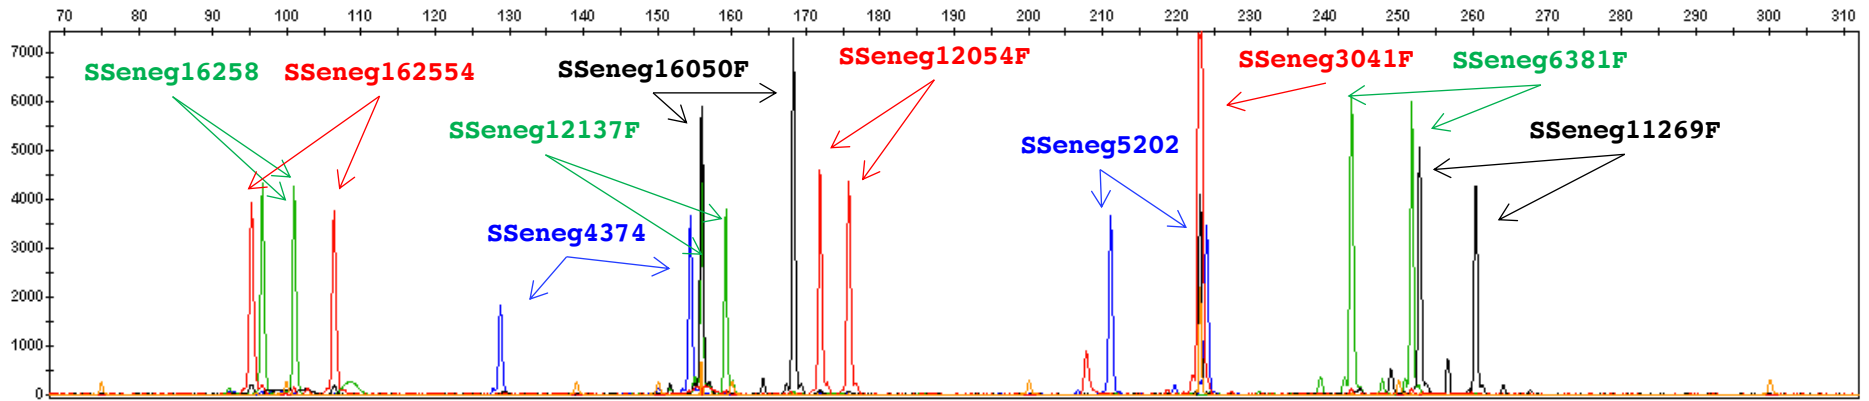

# Multiplex B

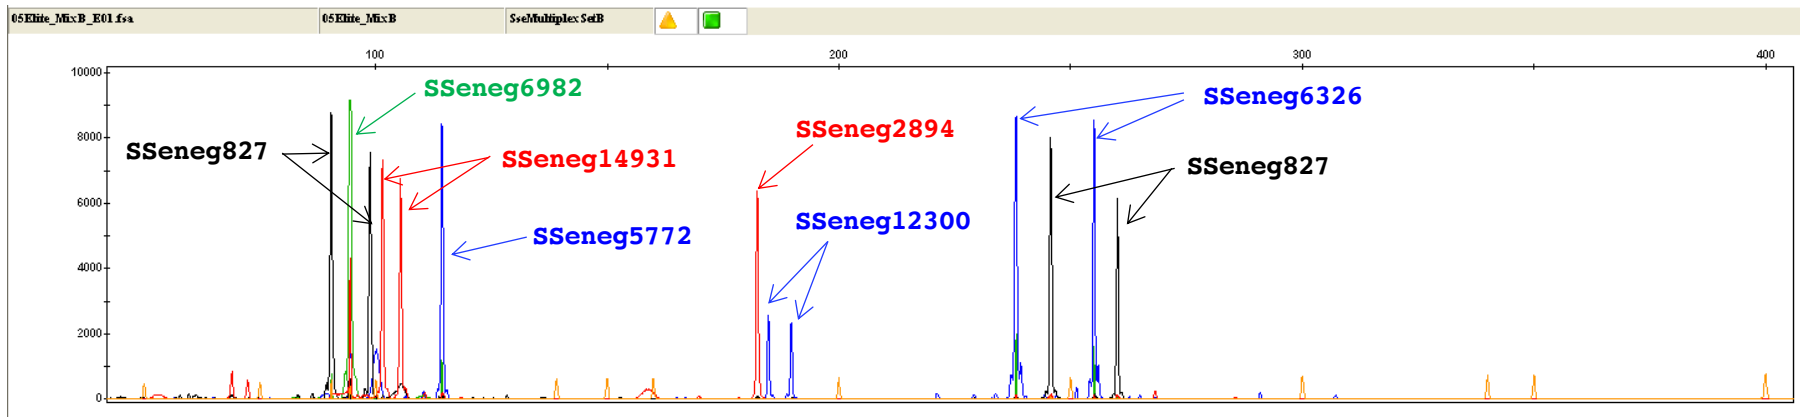

# Multiplex C

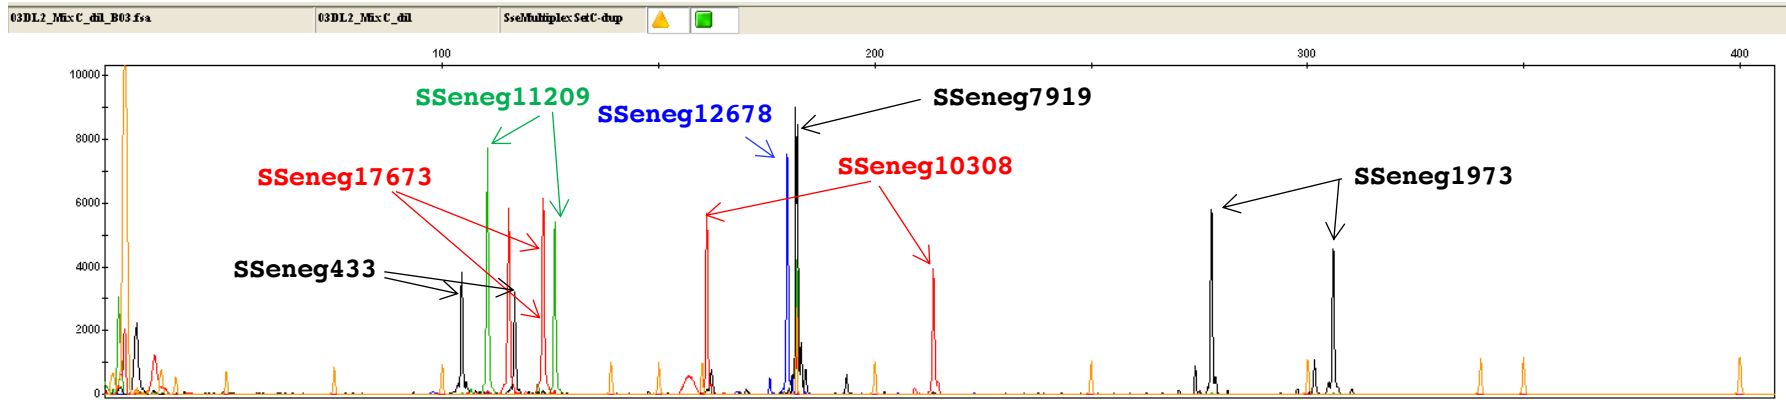

# Multiplex D

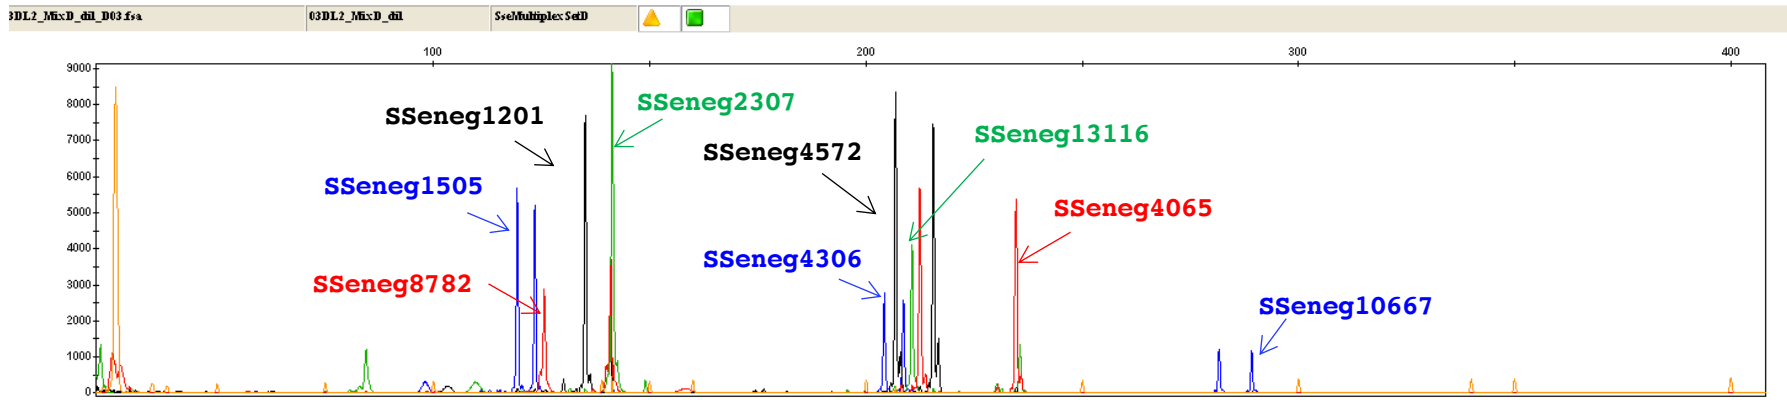

# Multiplex E

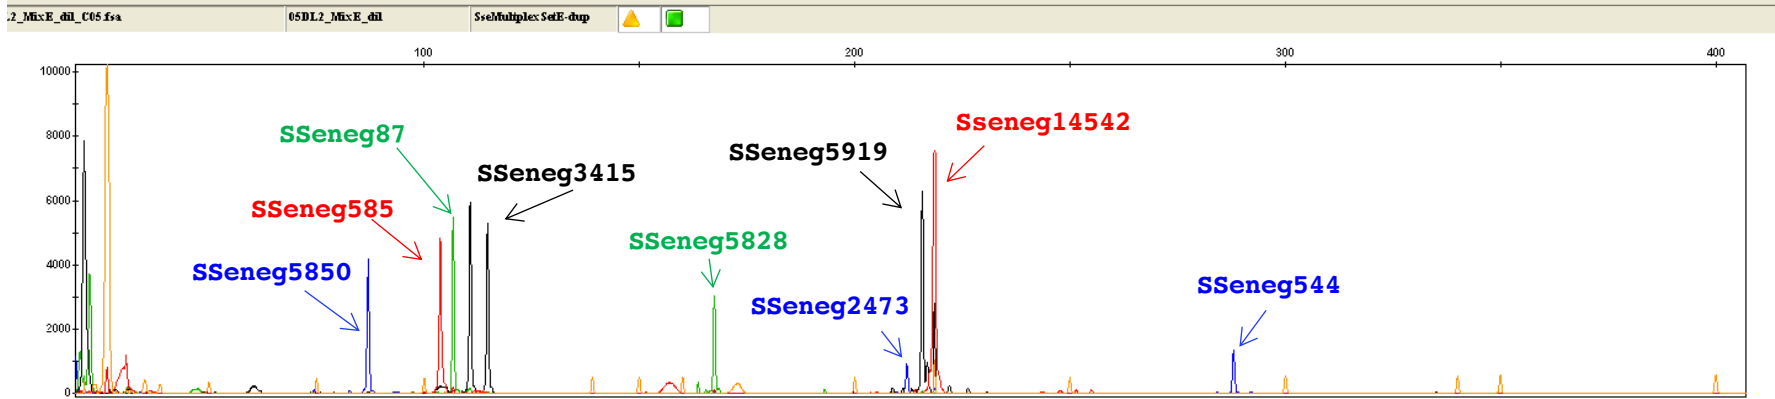

# Multiplex F

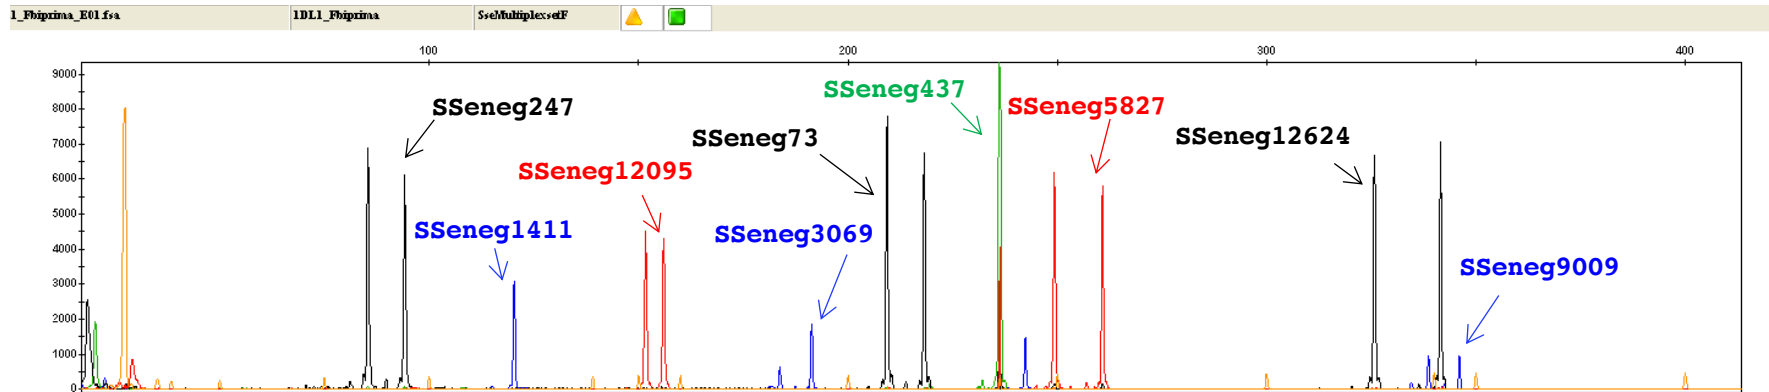

# Multiplex G

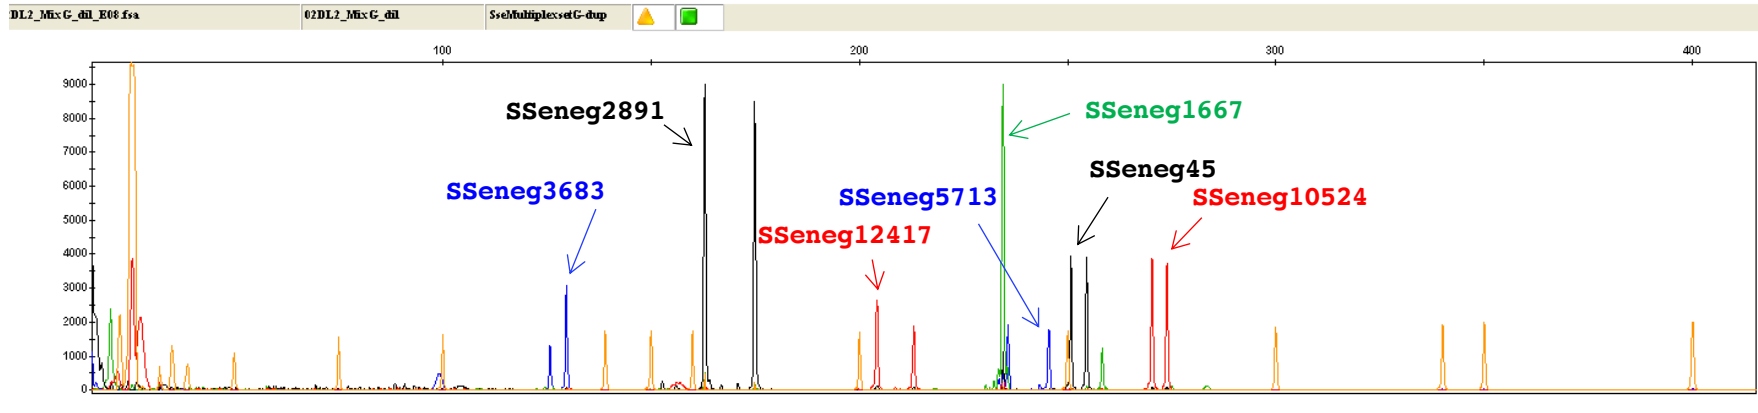

# Multiplex H

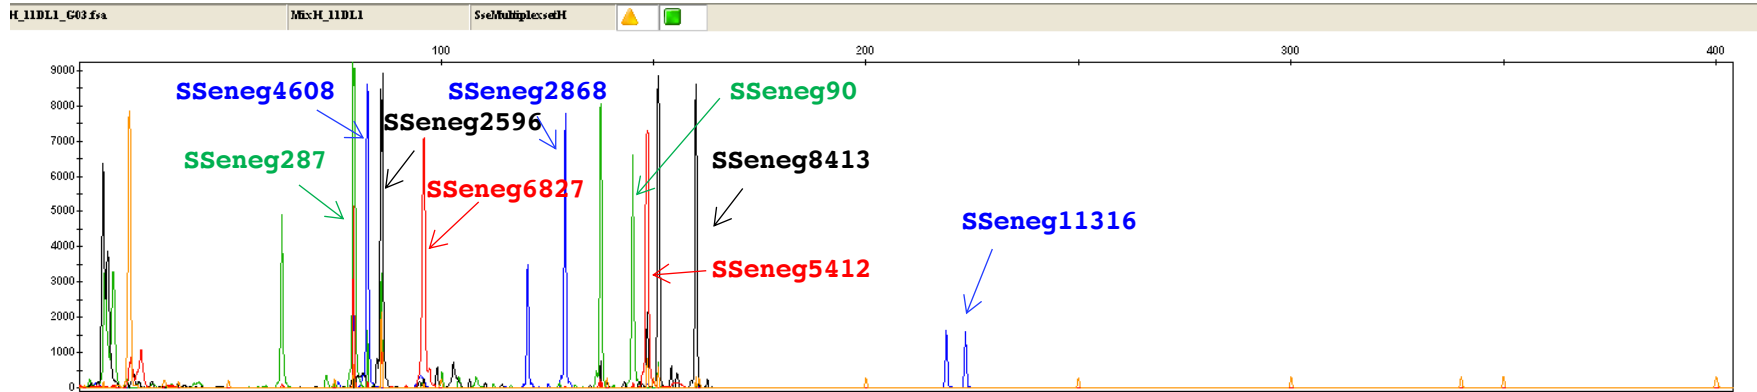

# Multiplex I

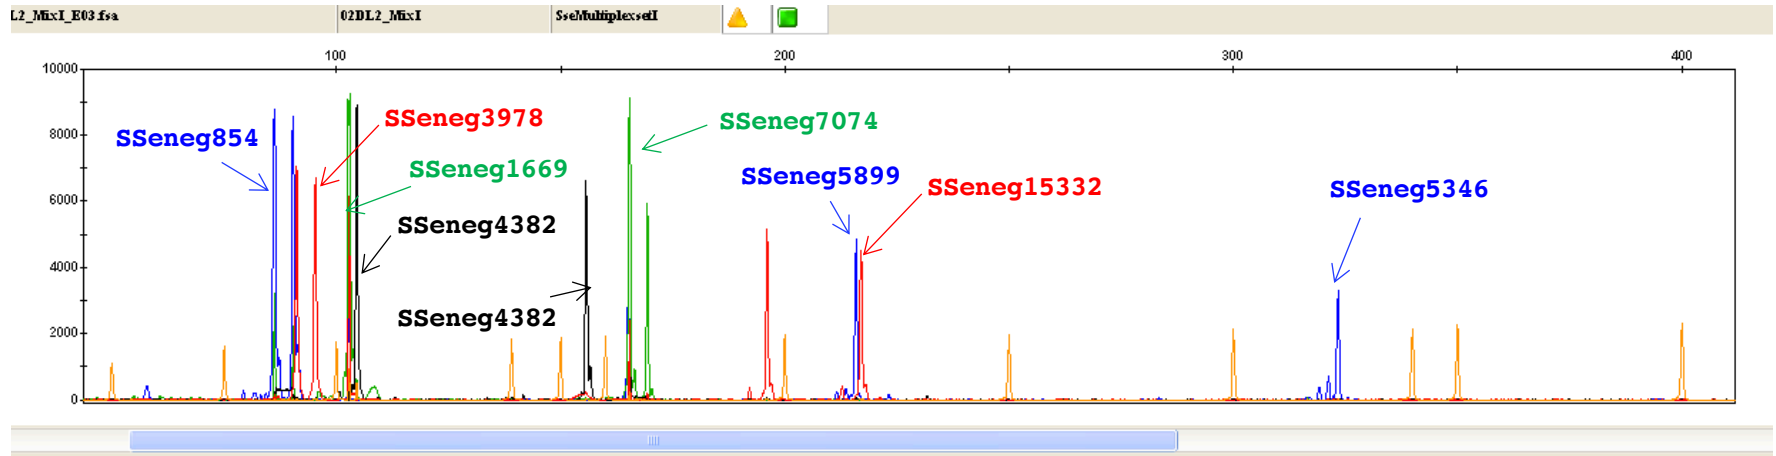

# Multiplex J

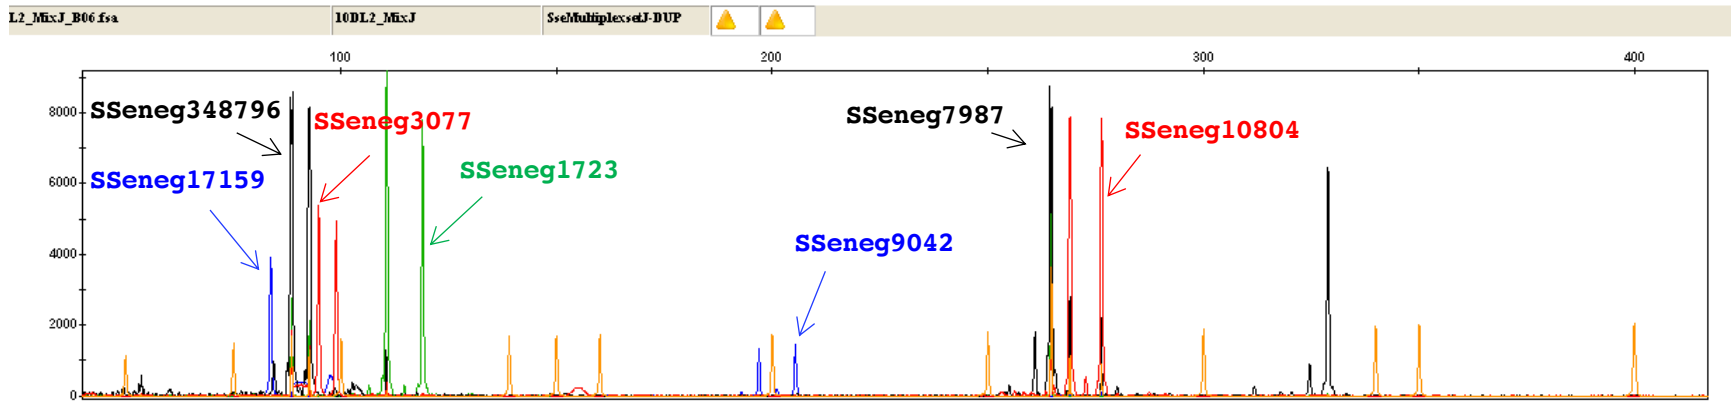

# Multiplex K

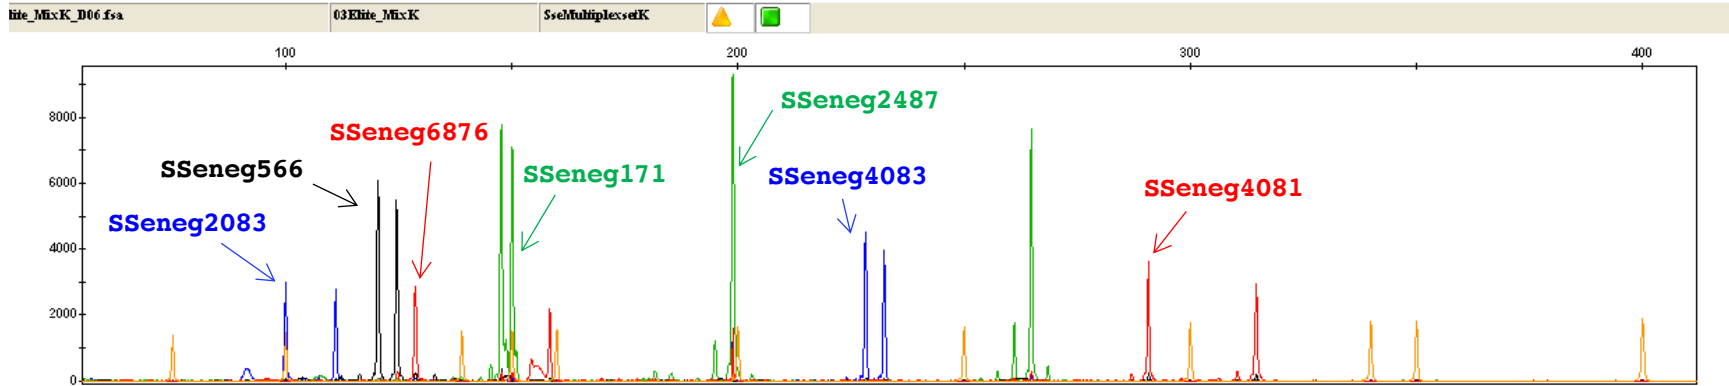

# Multiplex L

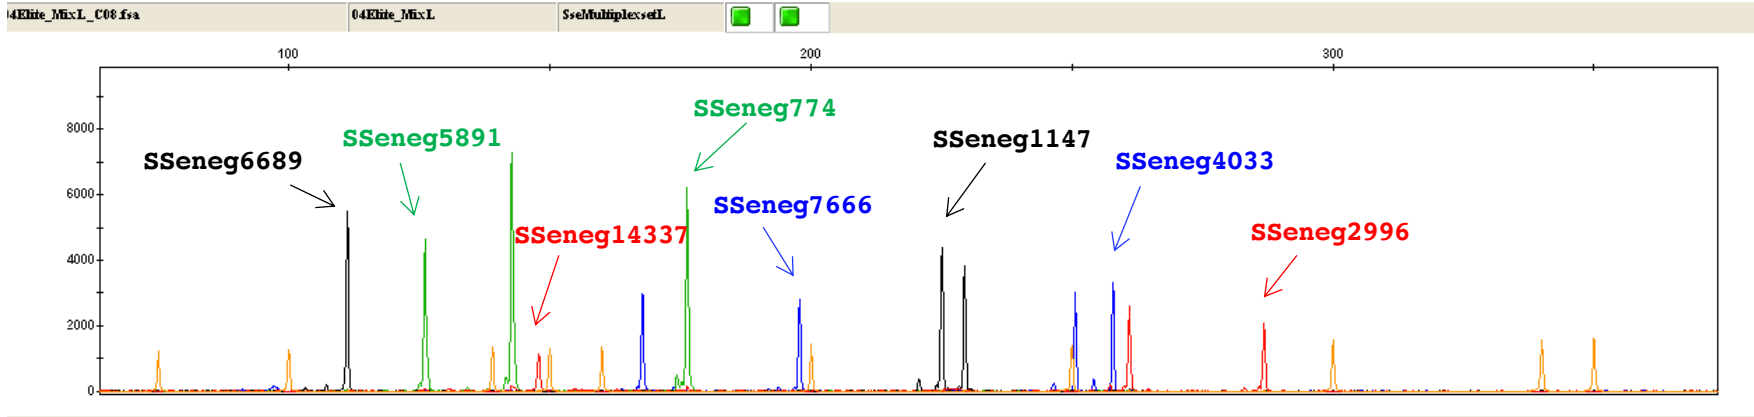

# Multiplex M

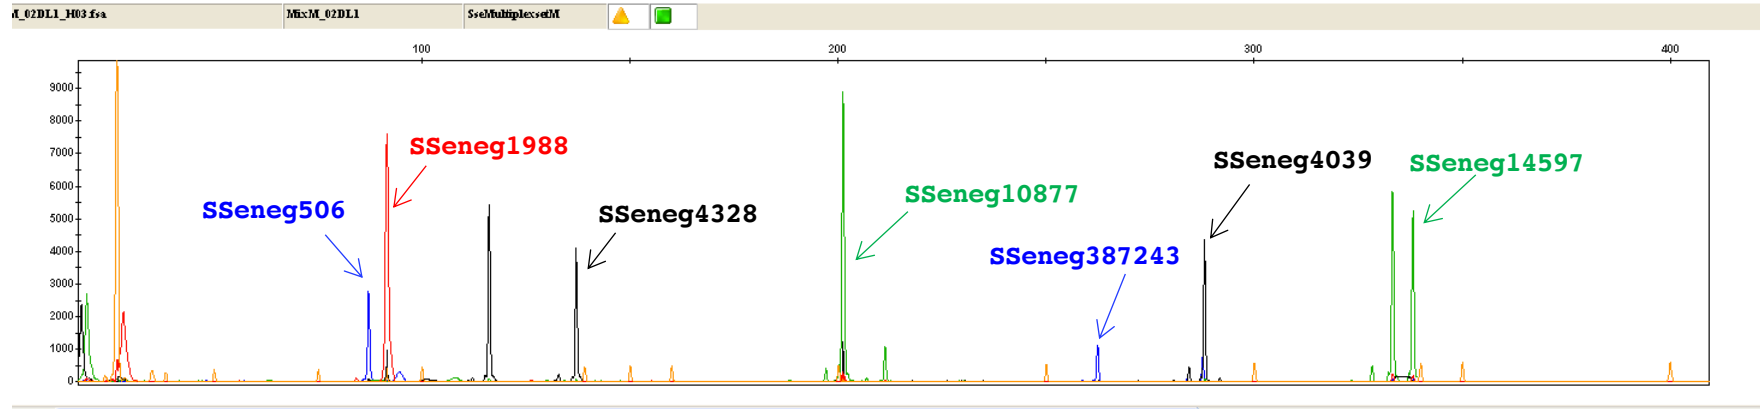

Supplement: 41598_2020_78397_MOESM2_ESM.pdf [file 41598_2020_78397_MOESM2_ESM.pdf]
